# Supplementary material
Source: publisher figshare collection journal article supplement (https://acs.figshare.com/ndownloader/files/25960224)
Supplement: Supplementary file 1 [file 25960224]

	SMILES DOCUment
	Molecular Formla Strings	in vitro PDT efficacy, IC50 (concentration: nM)	In vivo PDT efficacy (Tumor cure: 60 day)
Compound No.		UMUC3 ( bladder cancer) FaDu ( head & neck)	UMUC3 FaDu
Compond 5	CC(C(/C=C(C(C(OCCCCCC)C)=C/1C)\NC1=C/C(C(C)[C@@H]/2CCC(NCCCCN3C=C(C4=CC=CC(NC5=C(C=C(OCCOC)C(OCCOC)=C6)C6=NC=N5)=C4)N=N3)=O)=NC2=C7\CC8=O)=N/9)=C(CC)C9=C\C%10=C(C)C8=C7N%10	20.25 17.6	0.47 umole/kg: 20% 40%
Compond 7	C[C@@H]([C@@H]/1CCC(NCC2=CC(I)=CC=C2)=O)C(/C=C(N/3)/C(C)=C(C(C)OCCCCCC)C3=C\C4=N/C(C(CC)=C4C)=C\5)=NC1=C(CC6=O)/C7=C6C(C)=C5N7	187.4 519.8
Compound 8	C[C@@H]([C@@H]/1CCC(NCC2=CC(C#CC3=CC=CC(NC4=C(C=C(OCCOC)C(OCCOC)=C5)C5=NC=N4)=C3)=CC=C2)=O)C(/C=C(N/6)/C(C)=C(C(C)OCCCCCC)C6=C\C7=N/C(C(CC)=C7C)=C\8)=NC1=C(CC9=O)/C%10=C9C(C)=C8N%10	43.4 -
Compound 9	CC(OCC1=CC=CC(I)=C1)C2=C(C)/C3=C/C(C[C@@H]/4CCC(OC)=O)=NC4=C(CC5=O)/C6=C5C(C)=C(/C=C7C(CC)=C(C)C(/C=C2\N3)=N/7)N6
Compound 10	CC(OCC1=CC=CC(C#CC2=CC(NC3=C(C=C(OCCOC)C(OCCOC)=C4)C4=NC=N3)=CC=C2)=C1)C5=C(C)/C6=C/C(C[C@@H]/7CCC(OC)=O)=NC7=C(CC8=O)/C9=C8C(C)=C(/C=C%10C(CC)=C(C)C(/C=C5\N6)=N/%10)N9	59.4 35.5	0.47 mmole/kg: 74% 92%
Compound 11	CC(OCC1=CC=CC(C#CC2=CC(NC3=C(C=C(OCCOC)C(OCCOC)=C4)C4=NC=N3)=CC=C2)=C1)C5=C(C)/C6=C/C(C[C@@H]/7CCC(O)=O)=NC7=C(CC8=O)/C9=C8C(C)=C(/C=C%10C(CC)=C(C)C(/C=C5\N6)=N/%10)N9	54.8 31.8
Compound 12	CC(OCC1=CC=CC(I)=C1)C2=C(C)/C3=C/C(C[C@@H]/4CCC(OC)=O)=NC4=C(CC5=O)/C6=C5C(C)=C(/C=C7C(CC)C(C)C(/C=C2\N3)=N/7)N6
Compound 13	CC(OCC1=CC=CC(C#CC2=CC(NC3=C(C=C(OCCOC)C(OCCOC)=C4)C4=NC=N3)=CC=C2)=C1)C5=C(C)/C6=C/C(C[C@@H]/7CCC(OC)=O)=NC7=C(CC8=O)/C9=C8C(C)=C(/C=C%10C(CC)C(C)C(/C=C5\N6)=N/%10)N9	16.8 -
Compound 14	CC(OCC1=CC=CC(C#CC2=CC(NC3=C(C=C(OCCOC)C(OCCOC)=C4)C4=NC=N3)=CC=C2)=C1)C5=C(C)/C6=C/C(C[C@@H]/7CCC(O)=O)=NC7=C(CC8=O)/C9=C8C(C)=C(/C=C%10C(CC)C(C)C(/C=C5\N6)=N/%10)N9
Compound 15	C[C@@H]([C@@H]/1CCC(OC)=O)C(/C=C(N/2)/C(C)=C(C(C)OCC3=CC=C(I)C=C3)C2=C\C4=N/C(C(CC)=C4C)=C\5)=NC1=C(CC6=O)/C7=C6C(C)=C5N7	8.9 -
Compound 16	C[C@@H]([C@@H]/1CCC(OC)=O)C(/C=C(N/2)/C(C)=C(C(C)OCC3=CC=C(C#CC4=CC(NC5=C(C=C(OCCOC)C(OCCOC)=C6)C6=NC=N5)=CC=C4)C=C3)C2=C\C7=N/C(C(CC)=C7C)=C\8)=NC1=C(CC9=O)/C%10=C9C(C)=C8N%10	20.9 59.6	0.47 umole/kg: 60% 80%
Compound 17	C[C@@H]([C@@H]/1CCC(O)=O)C(/C=C(N/2)/C(C)=C(C(C)OCC3=CC=C(C#CC4=CC(NC5=C(C=C(OCCOC)C(OCCOC)=C6)C6=NC=N5)=CC=C4)C=C3)C2=C\C7=N/C(C(CC)=C7C)=C\8)=NC1=C(CC9=O)/C%10=C9C(C)=C8N%10
Compound 18	C[C@@H]([C@@H]/1CCC(OC)=O)C(/C=C(N/2)/C(C)=C(COCC3=CC=CC(I)=C3)C2=C\C4=N/C(C(CC)=C4C)=C\5)=NC1=C(CC6=O)/C7=C6C(C)=C5N7	34.4 59.6
Compound 19	C[C@@H]([C@@H]/1CCC(OC)=O)C(/C=C(N/2)/C(C)=C(COCC3=CC=CC(C#CC4=CC(NC5=C(C=C(OCCOC)C(OCCOC)=C6)C6=NC=N5)=CC=C4)=C3)C2=C\C7=N/C(C(CC)=C7C)=C\8)=NC1=C(CC9=O)/C%10=C9C(C)=C8N%10	76.3 23.3	0.47 umole/kg : 0%
Compound 20
Compound 21	CC(C(/C=C(C(CC)=C/1C)\NC1=C(C2=CC=C(C(O)=O)C=C2)/C(C(C)[C@@H]/3CCC(OC)=O)=NC3=C4\CC5=O)=N/6)=C(CC)C6=C\C7=CC5=C4N7
Compound 22	IC(C=C1)=CC=C1CNC(C(C=C2)=CC=C2/C(C(C(C)[C@@H]/3CCC(OC)=O)=NC3=C4\CC5=O)=C(N/6)\C(C)=C(CC)C6=C\C7=N/C(C(CC)=C7C)=C\C8=CC5=C4N8)=O	195.9 1,246
Compound 23	COCCOC(C(OCCOC)=C1)=CC(C1=CC=C2)=C2NC3=CC=CC(C#CC(C=C4)=CC=C4CNC(C(C=C5)=CC=C5/C(C(C(C)[C@@H]/6CCC(OC)=O)=NC6=C7\CC8=O)=C(N/9)\C(C)=C(CC)C9=C\C%10=N/C(C(CC)=C%10C)=C\C%11=CC8=C7N%11)=O)=C3	C30>10 uM
Compound 24
Compound 25	CC(C(/C=C(C(C(C)OCCCCCC)=C/1C)\NC1=C/C(C(C)[C@@H]/2CCC(NC(CCC(O)=O)(CCC(O)=O)CCC(O)=O)=O)=NC2=C3\CC4=O)=N/5)=C(CC)C5=C\C6=C(C)C4=C3N6
Compound 26	NCC1=CC(C#CC2=CC=CC(NC3=C(C=C(OCCOC)C(OCCOC)=C4)C4=NC=N3)=C2)=CC=C1
Compound 27	COCCOC1=CC2=NC=NC(NC3=CC(C#CC4=CC=CC(CNC(CCC(CCC(NCC5=CC=CC(C#CC6=CC=CC(NC7=C(C=C(OCCOC)C(OCCOC)=C8)C8=NC=N7)=C6)=C5)=O)(CCC(NCC9=CC=CC(C#CC%10=CC=CC(NC%11=C(C=C(OCCOC)C(OCCOC)=C%12)C%12=NC=N%11)=C%10)=C9)=O)NC(CC[C@H]%13C(C)C(/C=C(N/%14)/C(C)=C(C(C)OCCCCCC)C%14=C\C%15=N/C(C(CC)=C%15C)=C\%16)=N/C%13=C(CC%17=O)\C%18=C%17C(C)=C%16N%18)=O)=O)=C4)=CC=C3)=C2C=C1OCCOC
Compound 28	CC(C(/C=C(C(C=C)=C/1C)\NC1=C/C(C(C)[C@@H]/2CCC(OC)=O)=NC2=C3\C(N4CC5=CC(I)=CC=C5)=O)=N/6)=C(CC)C6=C\C7=C(C)C(C4=O)=C3N7
Compound 29	CC(C(/C=C(C(C=C)=C/1C)\NC1=C/C(C(C)[C@@H]/2CCC(OC)=O)=NC2=C3\C(N4CC5=CC(C#CC6=CC=CC(NC7=C(C=C(OCCOC)C(OCCOC)=C8)C8=NC=N7)=C6)=CC=C5)=O)=N/9)=C(CC)C9=C\C%10=C(C)C(C4=O)=C3N%10
Compound 30	CC(C(/C=C(C(C=C)=C/1C)\NC1=C/C(C(C)[C@@H]/2CCC(OC)=O)=NC2=C3\C(N4CC5=CC(I)=CC=C5)=O)=N/6)C(CC)C6=C\C7=C(C)C(C4=O)=C3N7
Compound 31	CC(C(/C=C(C(C=C)=C/1C)\NC1=C/C(C(C)[C@@H]/2CCC(OC)=O)=NC2=C3\C(N4CC5=CC(C#CC6=CC=CC(NC7=C(C=C(OCCOC)C(OCCOC)=C8)C8=NC=N7)=C6)=CC=C5)=O)=N/9)C(CC)C9=C\C%10=C(C)C(C4=O)=C3N%10	-6,925
Compound 32	C[C@@H]([C@@H]/1CCC(OC)=O)C(/C=C(N/2)/C(C)=C(C=C)C2=C\C3=N/C(C(CC)=C3C)=C\4)=NC1=C(C(C5=O)C(OC)=O)/C6=C5C(C)=C4N6
Compound 33	C[C@@H]([C@@H]/1CCC(OC)=O)C(/C=C(N/2)/C(C)=C(C(OCCCCCC)C)C2=C\C3=N/C(C(CC)=C3C)=C\4)=NC1=C(C(C5=O)C(OC)=O)/C6=C5C(C)=C4N6
Compound 34
Compound 35	C[C@@H]([C@@H]/1CCC(OC)=O)C(/C=C(N/2)/C(C)=C(C=C)C2=C\C3=N/C(C(CC)=C3C)=C\4)=NC1=C(CC(OC)=O)/C5=C(C(NCC6=CC(I)=CC=C6)=O)C(C)=C4N5	28.2 13.8
Compound 36	C[C@@H]([C@@H]/1CCC(OC)=O)C(/C=C(N/2)/C(C)=C(C(OCCCCCC)C)C2=C\C3=N/C(C(CC)=C3C)=C\4)=NC1=C(CC(OC)=O)/C5=C(C(NCC6=CC(I)=CC=C6)=O)C(C)=C4N5
Compound 37	C[C@@H]([C@@H]/1CCC(OC)=O)C(/C=C(N/2)/C(C)=C(C=C)C2=C\C3=N/C(C(CC)=C3C)=C\4)=NC1=C(CC(OC)=O)/C5=C(C(NCC6=CC(C#CC7=CC(NC8=C(C=C(OCCOC)C(OCCOC)=C9)C9=CC=C8)=CC=C7)=CC=C6)=O)C(C)=C4N5	39.6 33.42
Compound 38	C[C@@H]([C@@H]/1CCC(OC)=O)C(/C=C(N/2)/C(C)=C(C(OCCCCCC)C)C2=C\C3=N/C(C(CC)=C3C)=C\4)=NC1=C(CC(OC)=O)/C5=C(C(NCC6=CC(C#CC7=CC(NC8=C(C=C(OCCOC)C(OCCOC)=C9)C9=CC=C8)=CC=C7)=CC=C6)=O)C(C)=C4N5	3,502 -
Compound 39
Compound 40	C[C@@H]([C@@H]/1CCC(OC)=O)C(/C=C(N/2)/C(C)=C(C(C)OCCCCCC)C2=C\C3=N/C(C(CC)=C3C)=C\4)=NC1=C(CC(OC)=O)/C5=C(C(NCCCOCCOCCOCCCN)=O)C(C)=C4N5
Compound 41
Compound 42	C[C@@H]([C@@H]/1CCC(OC)=O)C(/C=C(N/2)/C(C)=C(C(C)OCCCCCC)C2=C\C3=N/C(C(CC)=C3C)=C\4)=NC1=C(CC(OC)=O)/C5=C(C(NCCCOCCOCCOCCCNC(CC6=CC=CC(I)=C6)=O)=O)C(C)=C4N5	6.8 15.4
Compound 43	C[C@@H]([C@@H]/1CCC(OC)=O)C(/C=C(N/2)/C(C)=C(C(C)OCCCCCC)C2=C\C3=N/C(C(CC)=C3C)=C\4)=NC1=C(CC(OC)=O)/C5=C(C(NCCCOCCOCCOCCCNC(CC6=CC=CC(C#CC7=CC=CC(NC8=C(C=C(OCCOC)C(OCCOC)=C9)C9=NC=N8)=C7)=C6)=O)=O)C(C)=C4N5	7.5 21.4
Compound 44
Compound 45
Compound 46	C[C@@H]([C@@H]/1CCC(OC)=O)C(/C=C(N/2)/C(C)=C(C=C)C2=C\C3=N/C(C(CC)=C3C)=C\4)=NC1=C(CC(OC)=O)/C5=C(C(NCCN)=O)C(C)=C4N5
Compound 47	C[C@@H]([C@@H]/1CCC(OC)=O)C(/C=C(N/2)/C(C)=C(C=C)C2=C\C3=N/C(C(CC)=C3C)=C\4)=NC1=C(CC(OC)=O)/C5=C(C(NCCNC(CCCC(NCCCOCCOCCOCCCN)=O)=O)=O)C(C)=C4N5
Compound 48	IC1=CC=CC(CC(O)=O)=C1
Compound 49	IC1=CC(CC(NCCCOCCOCCOCCCNC(CCCC(NCCNC(C2=C(/C(CC(OC)=O)=C3[C@@H](CCC(OC)=O)[C@H](C)C(/C=C(N/4)/C(C)=C(C=C)C4=C\C5=N/C(C(CC)=C5C)=C\6)=N/3)NC6=C2C)=O)=O)=O)=O)=CC=C1	26.4 19.2
Compound 50	COCCOC(C(OCCOC)=C1)=CC(C1=NC=N2)=C2NC3=CC(C#CC4=CC(CC(NCCCOCCOCCOCCCNC(CCCC(NCCNC(C5=C(/C(CC(OC)=O)=C6[C@@H](CCC(OC)=O)[C@H](C)C(/C=C(N/7)/C(C)=C(C=C)C7=C\C8=N/C(C(CC)=C8C)=C\9)=N/6)NC9=C5C)=O)=O)=O)=O)=CC=C4)=CC=C3	59.2 88.6
Compound 51	C[C@@H]([C@@H]/1CCC(OC)=O)C(/C=C(N/2)/C(C)=C(C=C)C2=C\C3=N/C(C(CC)=C3C)=C\4)=NC1=C(CC(O)=O)/C5=C(C(O)=O)C(C)=C4N5
Compound 52	C[C@@H]([C@@H]/1CCC(OC)=O)C(/C=C(N/2)/C(C)=C(C=C)C2=C\C3=N/C(C(CC)=C3C)=C\4)=NC1=C(CC(NCC5=CC=CC(I)=C5)=O)/C6=C(C(OC)=O)C(C)=C4N6
Compound 53	C[C@@H]([C@@H]/1CCC(OC)=O)C(/C=C(N/2)/C(C)=C(C=C)C2=C\C3=N/C(C(CC)=C3C)=C\4)=NC1=C(CC(NCC5=CC=CC(C#CC6=CC=CC(NC7=C(C=C(OCCOC)C(OCCOC)=C8)C8=NC=N7)=C6)=C5)=O)/C9=C(C(OC)=O)C(C)=C4N9	45.0 166.2
HPPH		68.4 43.8	0.47umole/kg: 30%
